# Supplementary material for: Sol–gel synthesis of a series of first row d-block ferrites via the epoxide addition method
Source: Royal Society of Chemistry journal article supplement (doi:10.1039/c6ra05831k), 2016-01-01
Supplement: c6ra05831k1.pdf [file c6ra05831k1.pdf]

Supporting Information. Figure S1: full porosimetry isotherms of all ferrites. Figure S2: Copper Ferrite Annealed at 350°C. Figure S3: Copper Ferrite Annealed at 700°C for 6 hours and ImageJ® analysis results. Figure S4: Thermal gravimetric analysis of the ferrites in each series. Table S1: Porosimetry result the copper ferrite annealed at 700 °C.

Figure S1: Porosimetry Isotherms

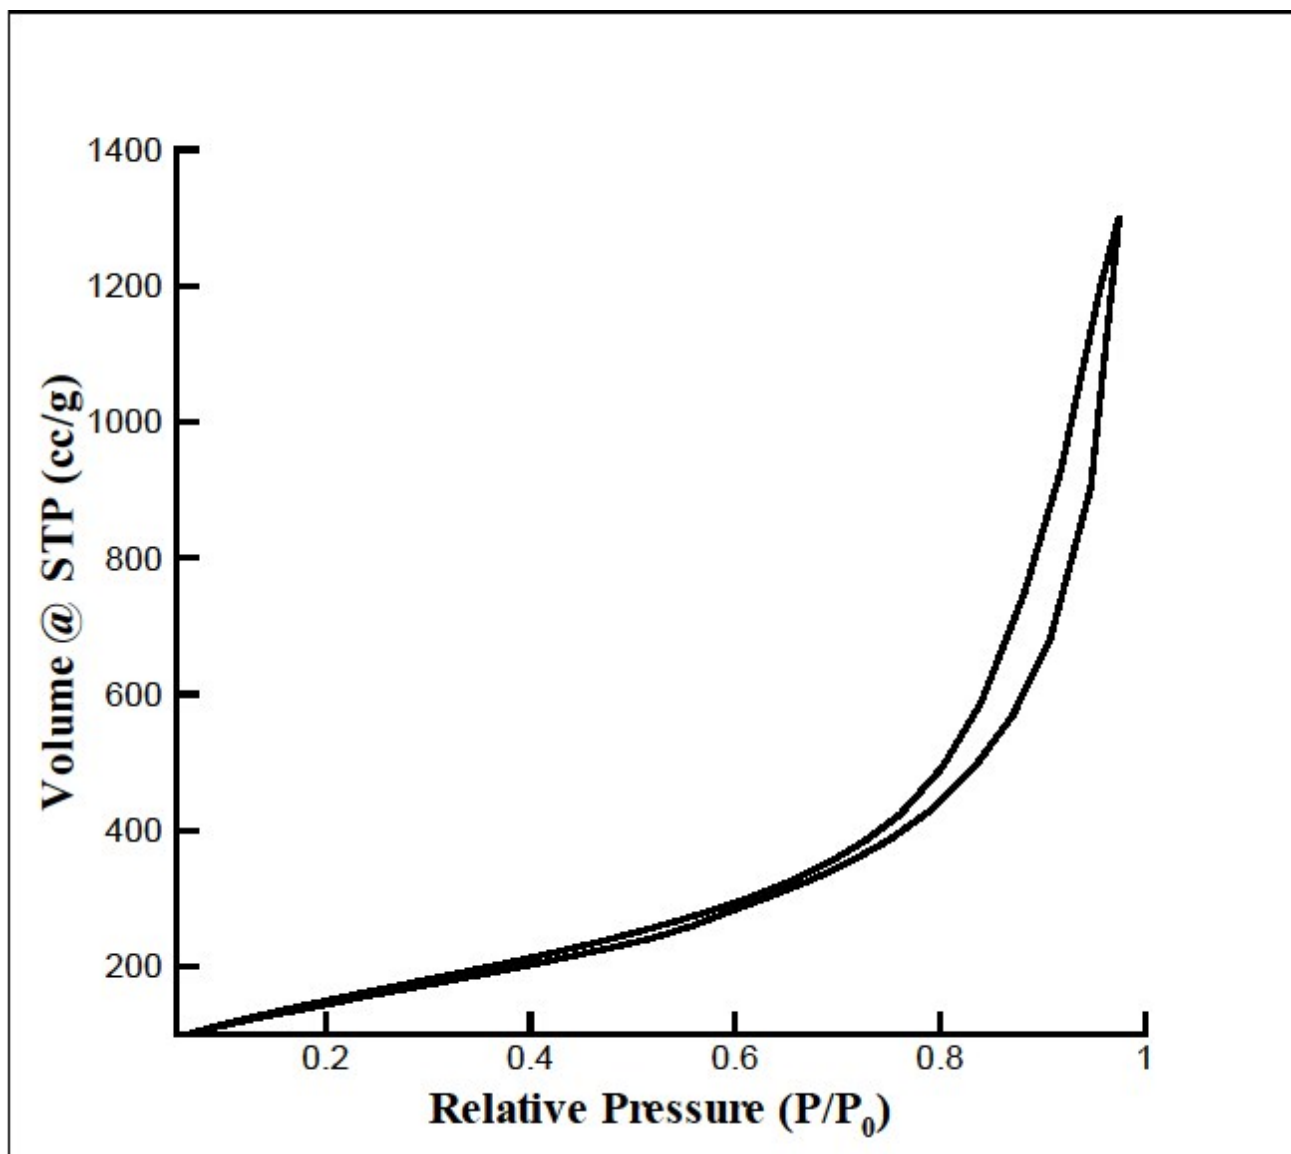

Figure S1-A: As prepared cobalt ferrite aerogel porosimetry isotherm

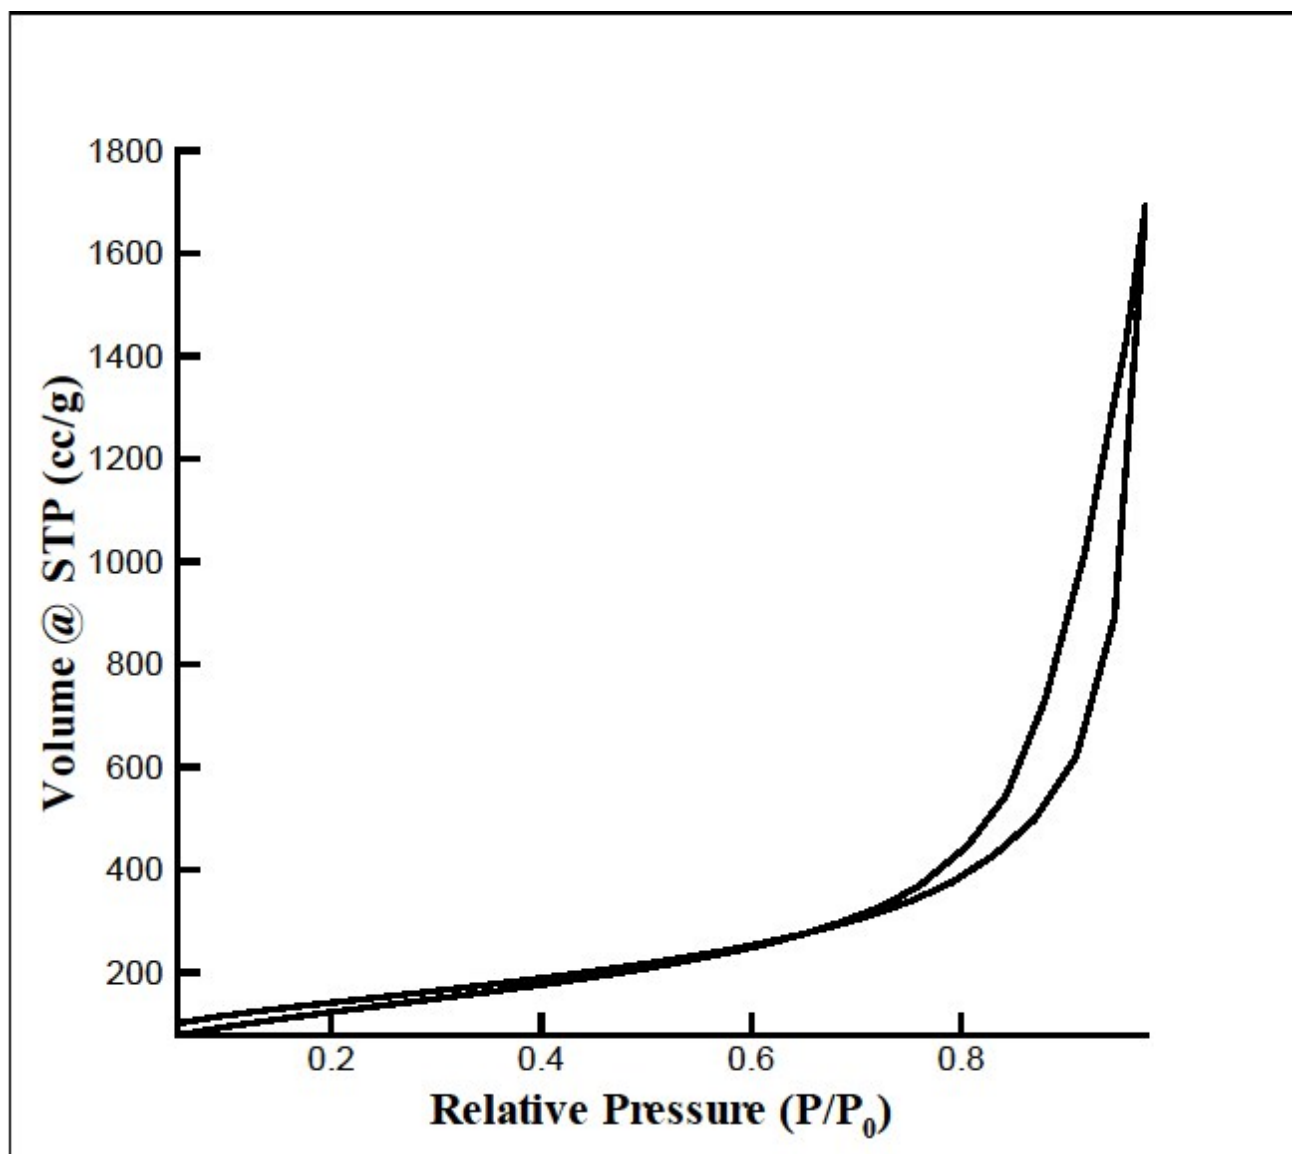

Figure S1-B: As prepared nickel ferrite aerogel porosimetry isotherm

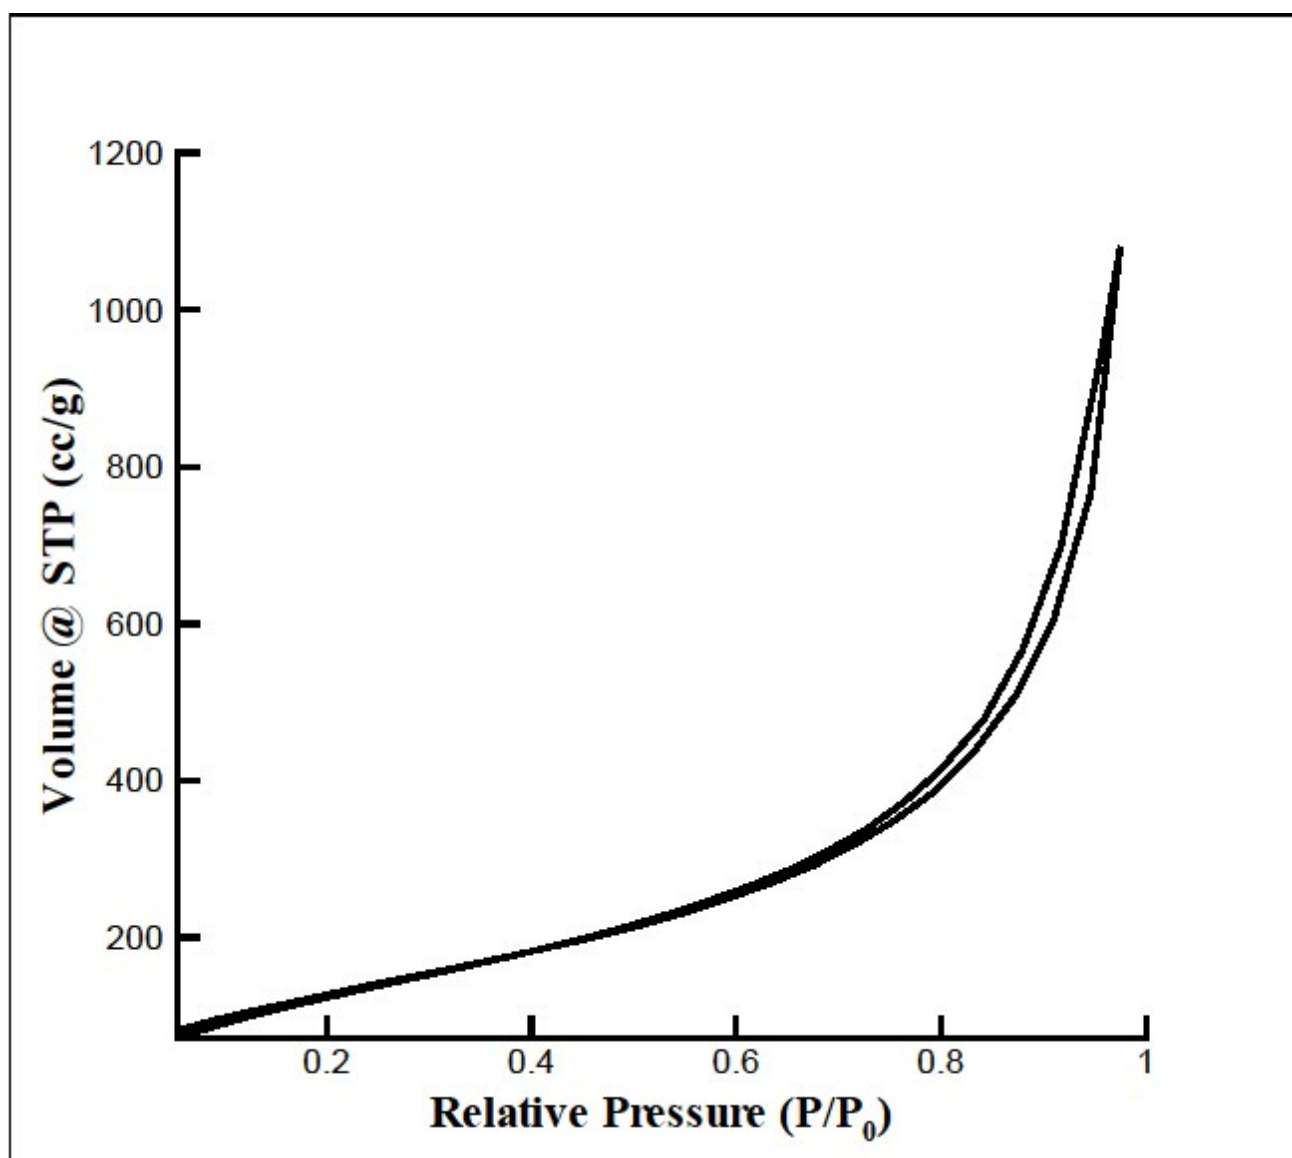

Figure S1-C: As prepared copper ferrite aerogel porosimetry isotherm

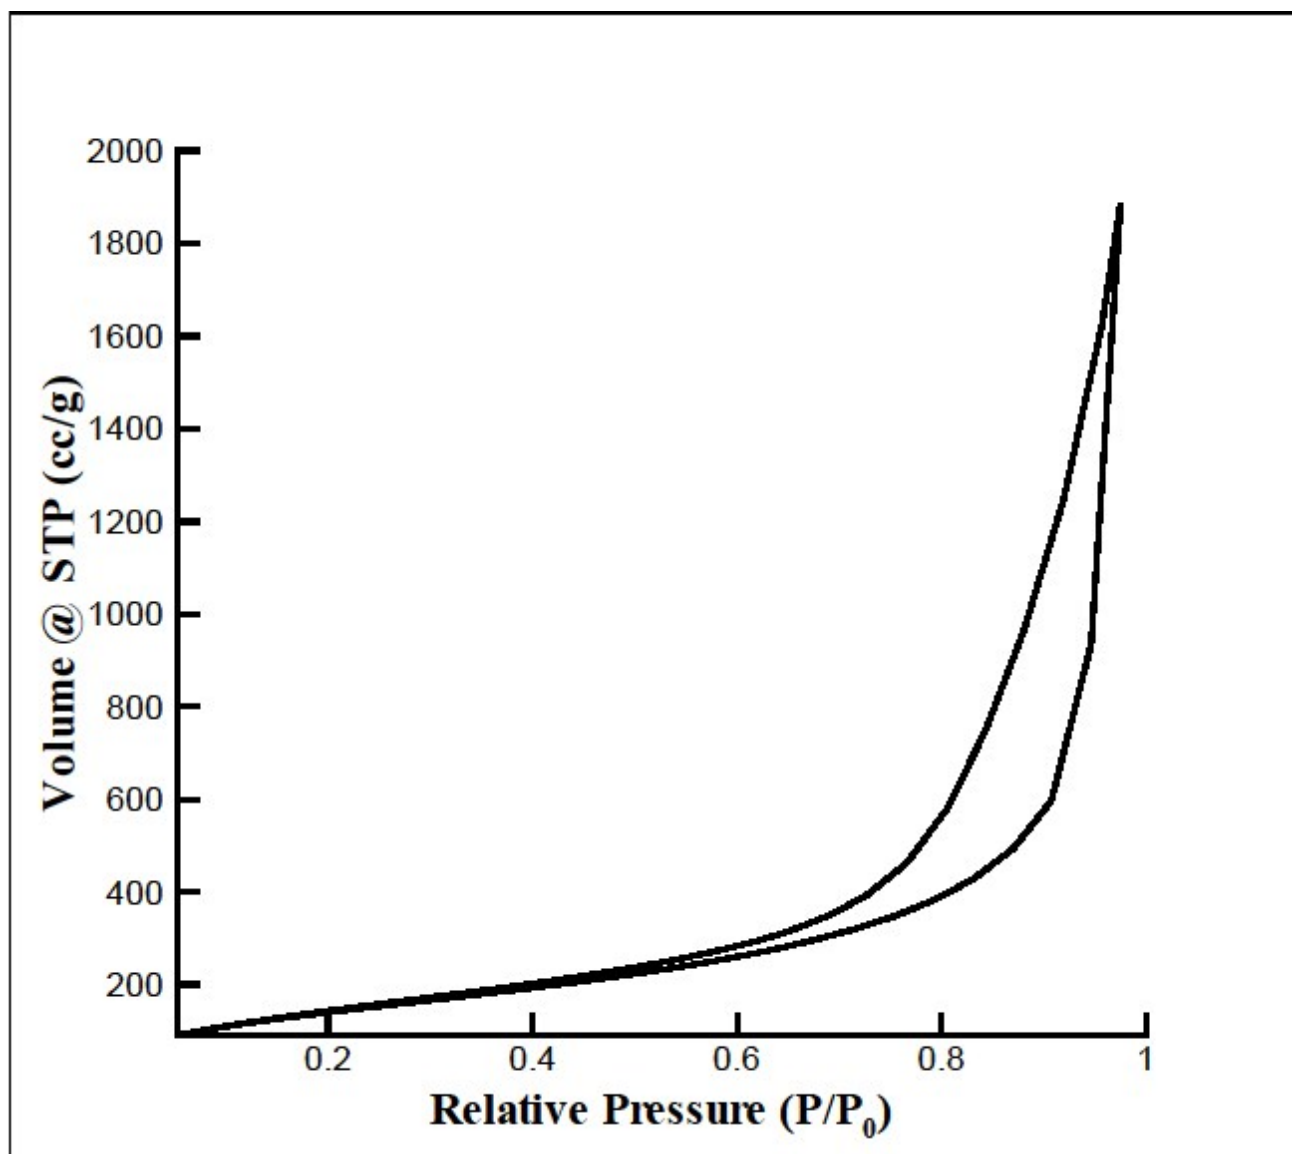

Figure S1-D: As prepared zinc ferrite aerogel porosimetry isotherm

Table S1: Porosimetry result the copper ferrite annealed at 700 °C

| Aerogel                          | BET S.A. (m <sup>2</sup> /g) | Pore volume (cm <sup>3</sup> /g) | Pore radius (nm) |
|----------------------------------|------------------------------|----------------------------------|------------------|
| Fe <sub>2</sub> CuO <sub>4</sub> | 15                           | 0.02                             | 1.8              |

Figure S2: Copper Ferrite Annealed at 350°C

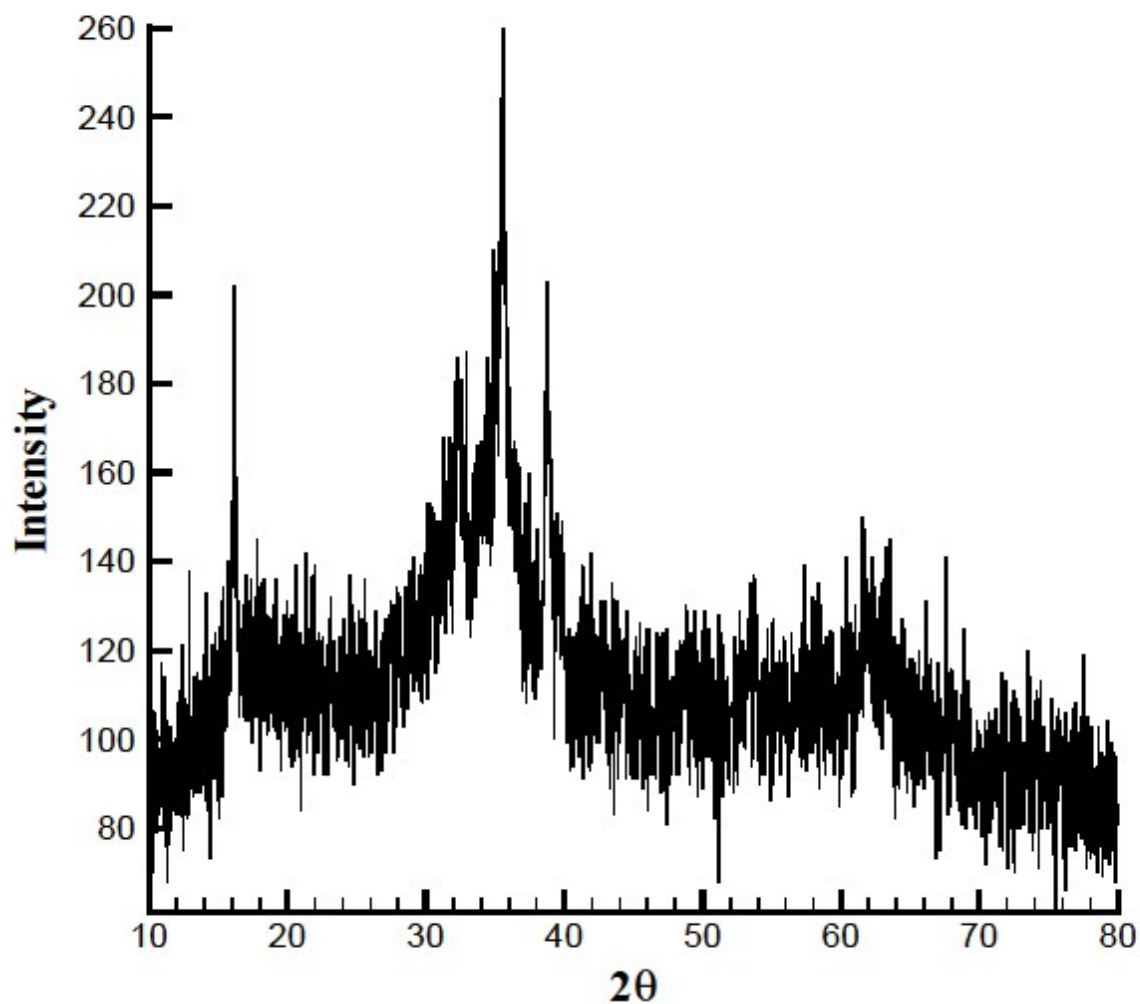

Figure S2: After annealing at 350°C, copper ferrite aerogels do not show significant copper ferrite reflections and are essentially amorphous. Crystalline peaks match to CuO and  $\text{Cu}_2\text{Cl}(\text{OH})_3$ : starting materials.

Figure S3: Copper Ferrite Annealed at 700°C for 6 hours

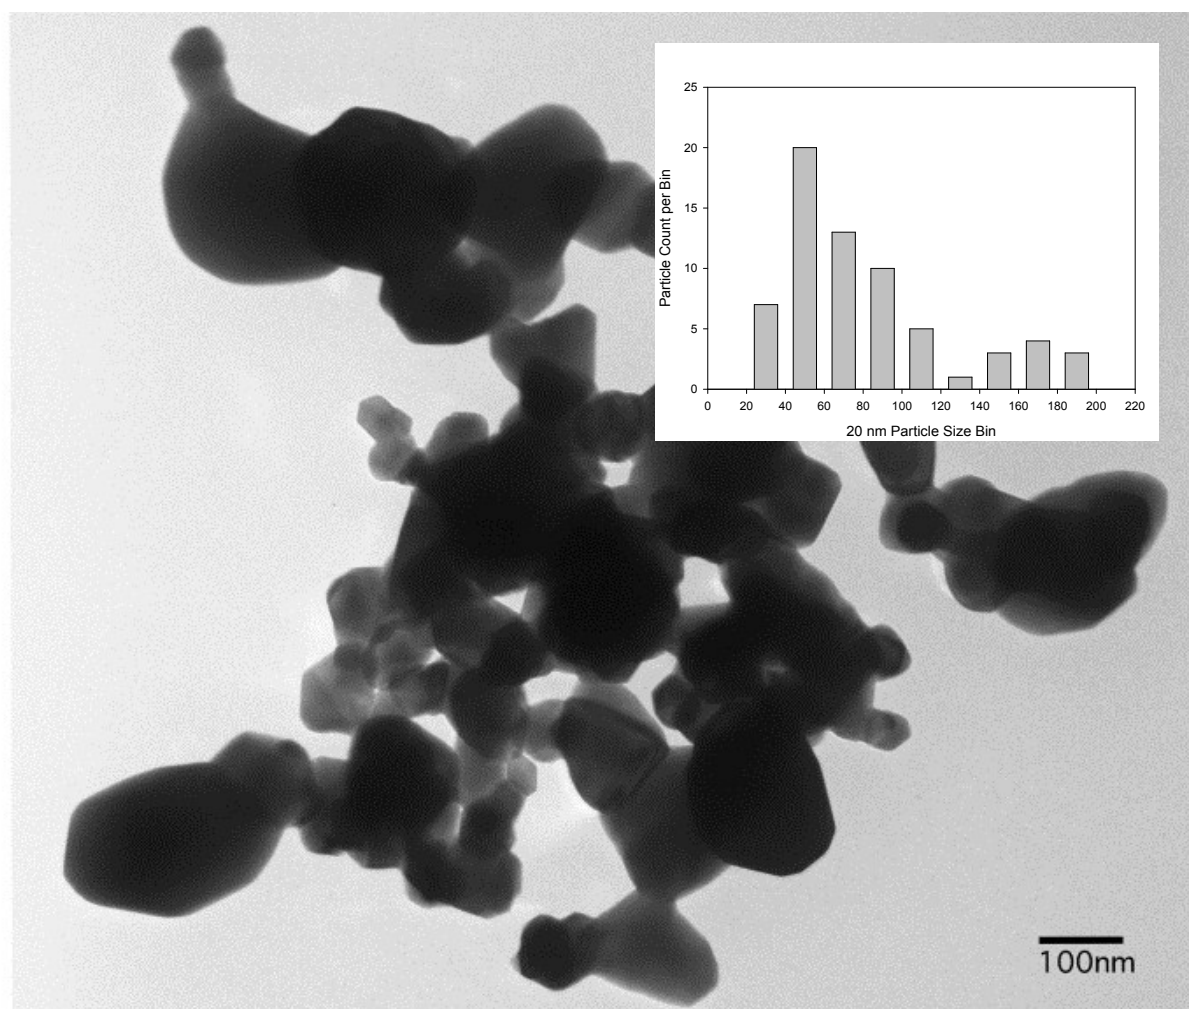

Figure S3: After annealing at 700°C, copper ferrite particles grow (Ostwald ripening) to an average of 70 nm on a bimodal distribution with modes at 50 and 170 nm.

Figure S4: Thermal gravimetric analysis of the ferrites

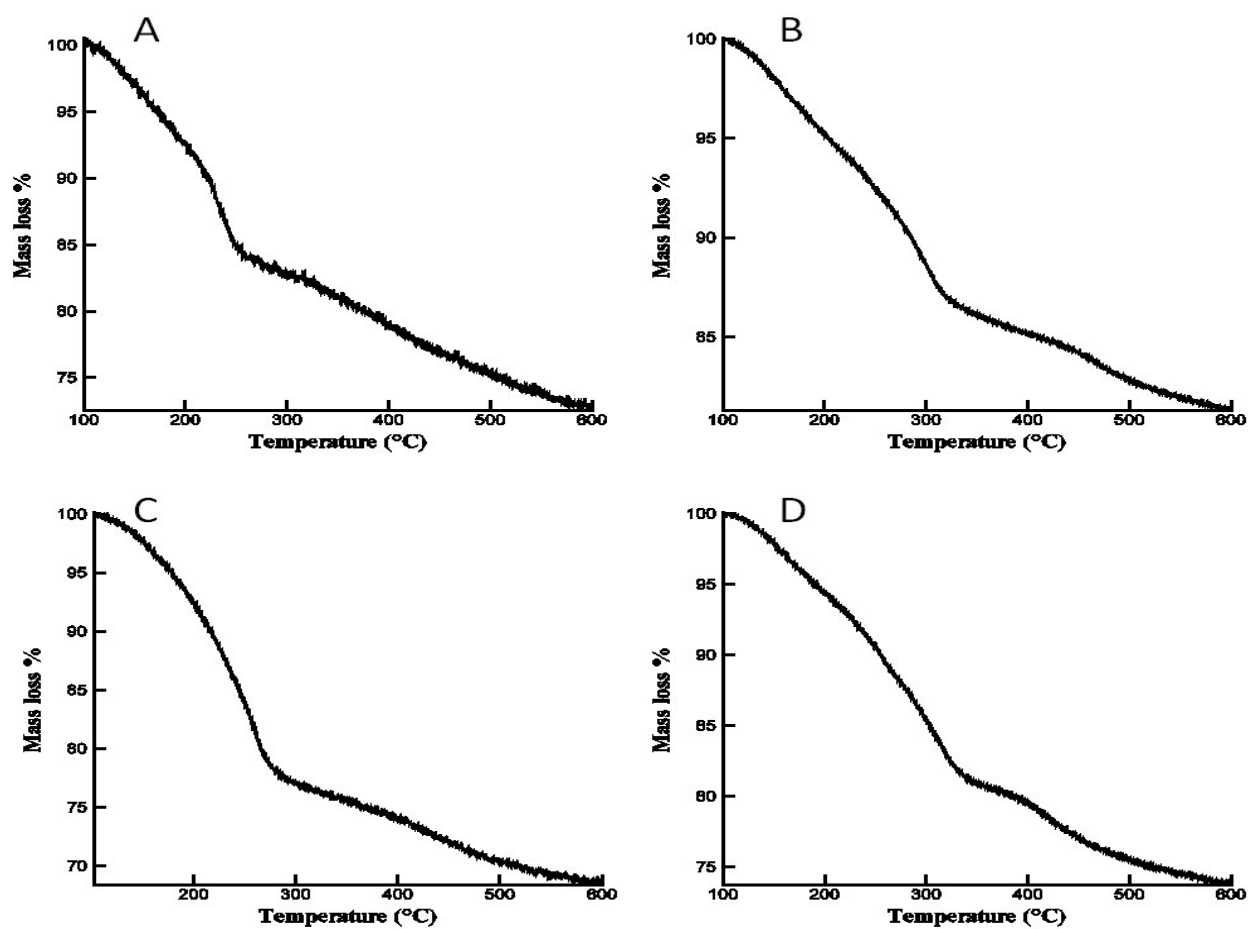

Figure S4: Thermal gravimetric analysis of each of the ferrites in the series. A: CoFe<sub>2</sub>O<sub>4</sub>; B: NiFe<sub>2</sub>O<sub>4</sub>; C: CuFe<sub>2</sub>O<sub>4</sub>; D: ZnFe<sub>2</sub>O<sub>4</sub>.
